# Supplementary material for: Omental Macrophagic “Crown-like Structures” Are Associated with Poor Prognosis in Advanced-Stage Serous Ovarian Cancer
Source: Curr Oncol. 2021 Oct 19;28(5):4234–46. doi: 10.3390/curroncol28050359 (PMC8534828; doi:10.3390/curroncol28050359)
Supplement: Supplementary file 1 [file curroncol-28-00359-s001.zip › curroncol-1362866-supplementary.pdf]

Article

# Omental Macrophagic “Crown-Like Structures” Are Associated with Poor Prognosis in Advanced-Stage Serous Ovarian Cancer

Yu-Ling Liang <sup>1,†</sup>, Chang-Ni Lin <sup>1,†</sup>, Hsing-Fen Tsai <sup>1</sup>, Pei-Ying Wu <sup>1</sup>, Sheng-Hsiang Lin <sup>2</sup>, Tse-Ming Hong <sup>2,\*</sup> and Keng-Fu Hsu <sup>1,2,\*</sup>

## Supplementary Materials

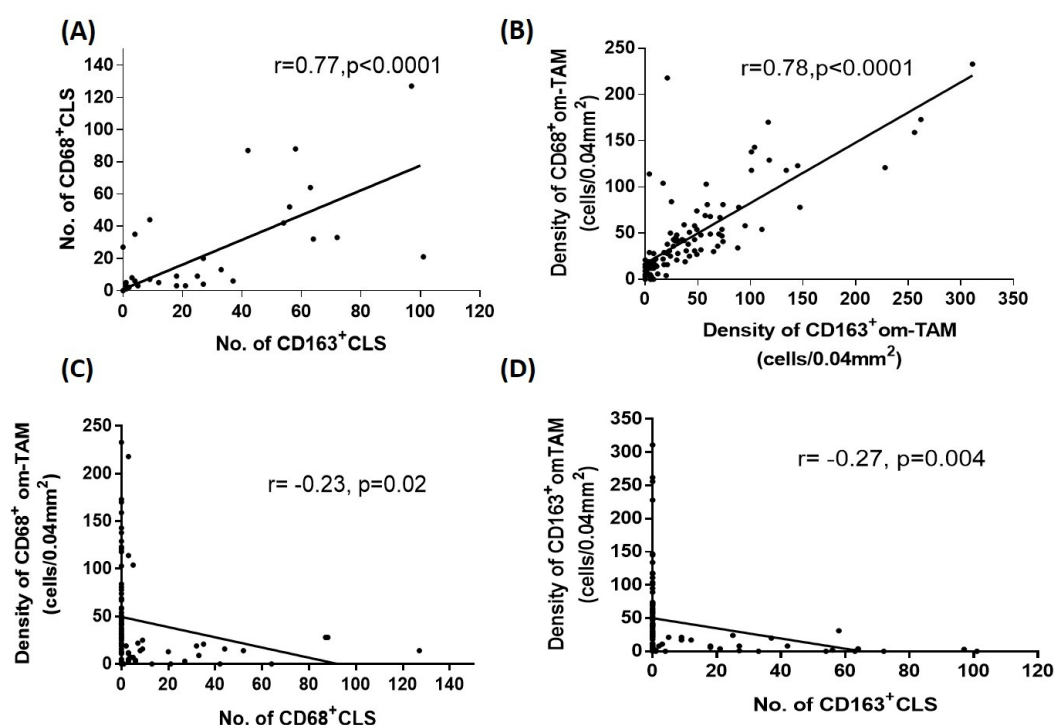

**Figure S1.** The number of omental CD68<sup>+</sup> CLSs exhibited a positive correlation with omental CD163<sup>+</sup> CLSs; the density of CD68<sup>+</sup> om-TAMs had a positive correlation with the density of CD163<sup>+</sup> om-TAMs. There was little correlation between the density of CD68<sup>+</sup> om-TAMs and CD68<sup>+</sup> CLSs or between the density of CD163<sup>+</sup> om-TAMs and the number of CD163<sup>+</sup> CLSs. (A) There was a strong positive correlation between the number of omental CD68<sup>+</sup> CLSs and the number of omental CD163<sup>+</sup> CLSs ( $r = 0.77$ ,  $p<0.0001$ ). (B) There was a strongly positive correlation between the density of CD68<sup>+</sup> om-TAMs and CD163<sup>+</sup> om-TAMs ( $r = 0.78$ ,  $p<0.0001$ ). (C) There was little correlation between the density of CD68<sup>+</sup> om-TAMs and CD68<sup>+</sup> CLSs ( $r = -0.23$ ,  $p=0.02$ ). (D) There was little correlation between the density of CD163<sup>+</sup> om-TAMs and the number of CD163<sup>+</sup> CLSs ( $r = -0.27$ ,  $p = 0.004$ ).

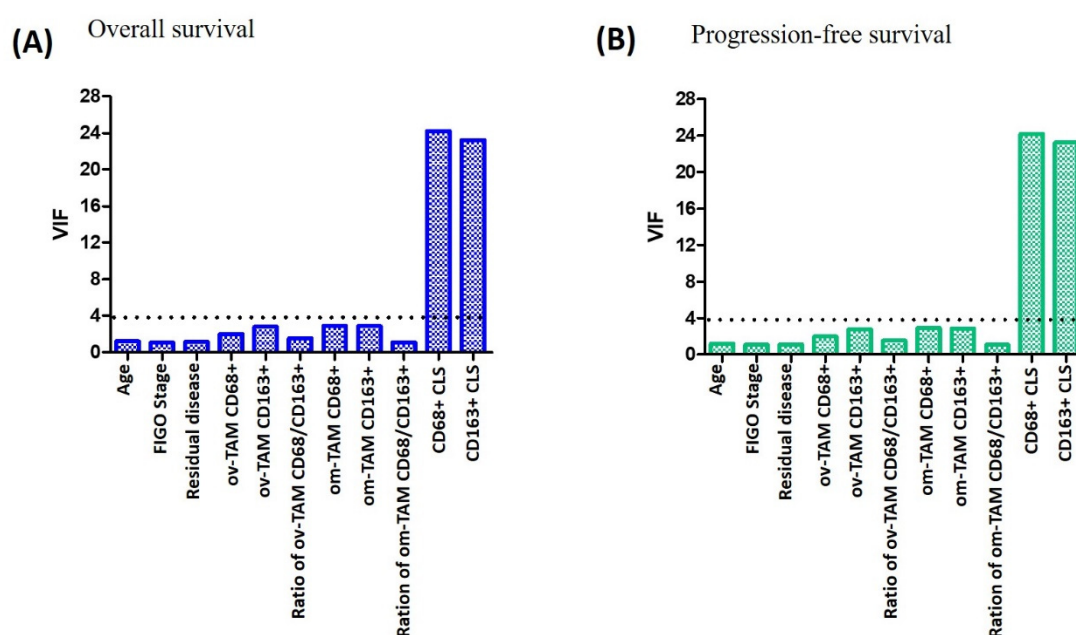

**Figure S2.** There was a high degree of multicollinearity for CD68<sup>+</sup> CLSs and CD163<sup>+</sup> CLSs in the model for OS and PFS. (A) The VIFs of CD68<sup>+</sup> CLSs and CD163<sup>+</sup> CLSs in OS were 24.22 and 23.22, respectively. (B) The VIFs of CD68<sup>+</sup> CLSs and CD163<sup>+</sup> CLSs in PFS were 24.1 and 23.2, respectively.

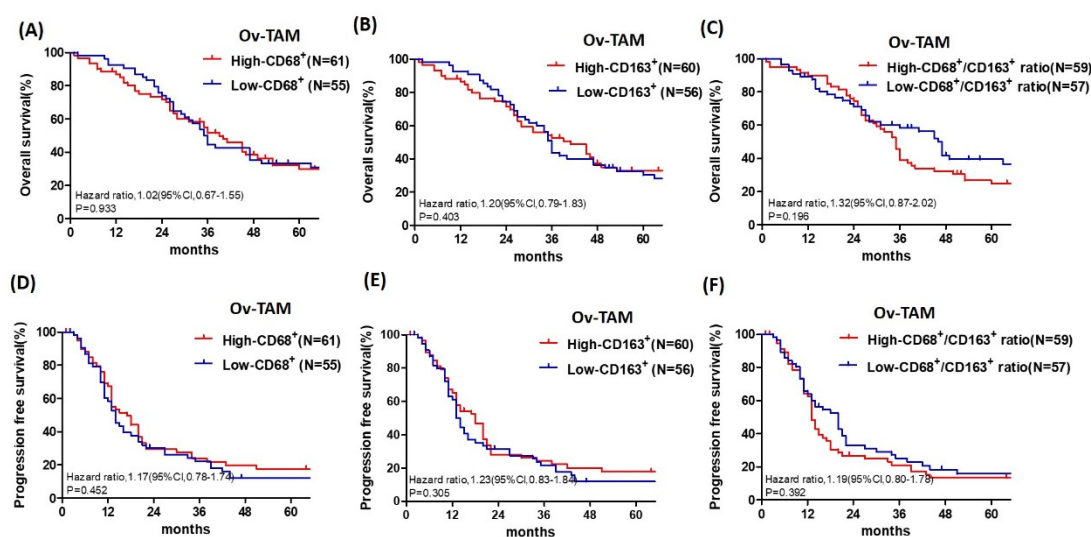

**Figure S3.** In advanced-stage HGSOC, the ovarian tumor density of CD68<sup>+</sup> or CD163<sup>+</sup> ov-TAMs was not associated with patient prognosis. (A, B) For OS analysis, neither the density of CD68<sup>+</sup> nor CD163<sup>+</sup> ov-TAMs was associated with patient OS (p=0.933; p=0.403, respectively). (D, E) For PFS analysis, neither the density of CD68<sup>+</sup> or CD163<sup>+</sup> ov-TAMs was associated with patient PFS (p=0.452; p=0.305, respectively). (C, F) The ratio of primary ovarian tumor CD68<sup>+</sup>/CD163<sup>+</sup> TAM was not significantly associated with OS or PFS (p=0.196; p=0.392).

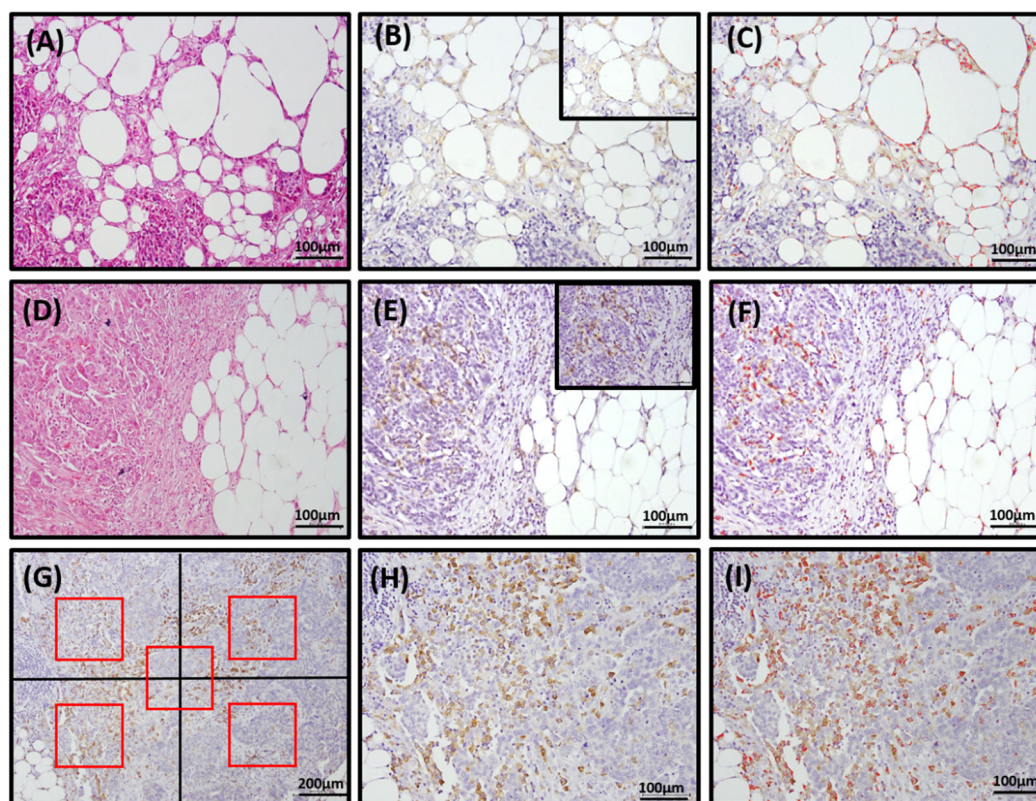

**Figure S4.** Representative image of CLS and TAMs by immunohistochemical staining for CD163 and ImageJ software-assisted images. A, D, and G, H&E; B, E, and H, IHC CD163 staining; C, F and I, ImageJ images. In (C), note that there are five adipocytes completely surrounded by CD163-positive macrophages, counted as five CD163<sup>+</sup> CLSs. (G) For TAM density, the area with the greatest concentration of CD163-stained TAMs was identified. Then, five fields (red box, four quadrants and a central area, each field contained 0.04 mm<sup>2</sup>) under 100 × magnification were selected, and the number of CD163<sup>+</sup> macrophages was counted under 200 × magnification with the assistance of ImageJ software (I).

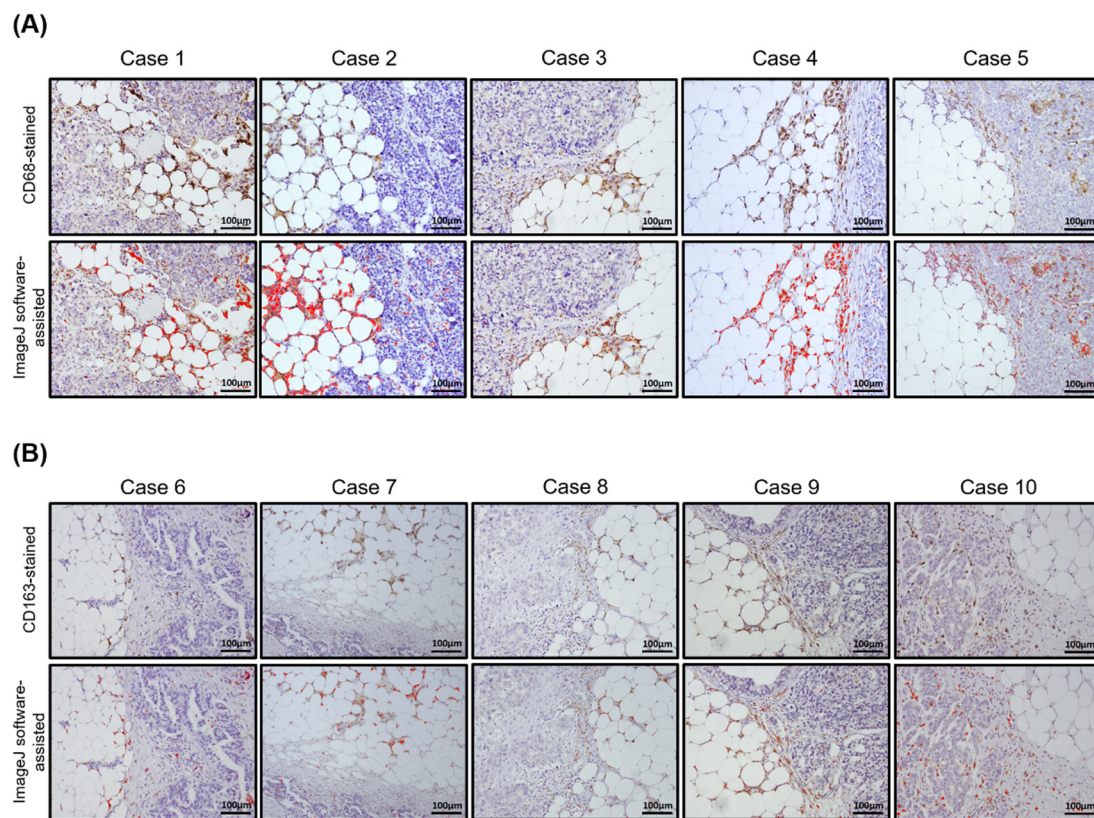

**Figure S5.** Ten cases of different counts of CLSs existence in omentum after CD68 (A, upper) or CD163 (B, upper) staining. Lower panels of pictures were CD68- or CD163-positive macrophages quantitatively by ImageJ software to perform CLS number calculation.

**Table S1.** Association between clinical parameters and primary ovarian tumor TAM in 116 advanced stage serous ovarian cancer patients.

| Variable           | Total<br>N=116 | CD68 <sup>+</sup> ov-TAM |               |         | CD163 <sup>+</sup> ov-TAM |               |         | Ratio of CD68 <sup>+</sup> /CD163 <sup>+</sup> ov-TAM |               |         |
|--------------------|----------------|--------------------------|---------------|---------|---------------------------|---------------|---------|-------------------------------------------------------|---------------|---------|
|                    |                | High<br>(N=61)           | Low<br>(N=55) | P value | High<br>(N=60)            | Low<br>(N=56) | P value | High<br>(N=59)                                        | Low<br>(N=57) | P value |
| Age(y/o)           |                |                          |               |         |                           |               |         |                                                       |               |         |
| Mean (range)       | 57.2 (23~88)   | 55.3 (23~88)             | 58.9 (44~82)  | 0.16    | 55.4 (23~88)              | 58.8 (36~82)  | 0.38    | 58.8 (30~88)                                          | 55.2 (23~84)  | 0.61    |
| BMI                |                |                          |               |         |                           |               |         |                                                       |               |         |
| Mean (range)       | 23 (15~34)     | 23 (18~34)               | 22 (15~34)    | 0.08    | 24 (18~34)                | 22 (15~29)    | 0.03    | 23 (15~34)                                            | 23 (16~34)    | 0.51    |
| FIGO stage         |                |                          |               | 1       |                           |               |         | 1                                                     |               |         |
| IIIA               | 4 (3)          | 3 (5)                    | 1 (2)         |         | 2 (3)                     | 2 (4)         |         | 2 (3)                                                 | 2 (3)         |         |
| IIIB               | 17 (15)        | 6 (10)                   | 11 (20)       |         | 9 (15)                    | 8 (14)        |         | 11 (19)                                               | 6 (11)        |         |
| IIIC               | 82 (71)        | 45 (74)                  | 37 (67)       |         | 42 (70)                   | 40 (71)       |         | 40 (68)                                               | 42 (74)       |         |
| IVA                | 9 (8)          | 5 (8)                    | 4 (7)         |         | 4 (7)                     | 5 (9)         |         | 5 (8)                                                 | 4 (7)         |         |
| IVB                | 4 (3)          | 2 (3)                    | 2 (4)         |         | 3 (5)                     | 1 (2)         |         | 1 (2)                                                 | 3 (5)         |         |
| Residual disease   |                |                          |               | 1       |                           |               |         | 0.57                                                  |               |         |
| optimal(≤1 cm)     | 71 (61)        | 37 (61)                  | 34 (62)       |         | 34 (57)                   | 37 (66)       |         | 38 (64)                                               | 33 (58)       |         |
| Not-optimal(>1 cm) | 45 (39)        | 24 (39)                  | 21 (38)       |         | 26 (43)                   | 19 (34)       |         | 21 (36)                                               | 24 (42)       |         |
| Chemotherapy       |                |                          |               | 0.70    |                           |               |         | 0.85                                                  |               |         |
| sensitive          | 70 (60)        | 38 (63)                  | 32 (58)       |         | 37 (62)                   | 33 (60)       |         | 35 (59)                                               | 35 (61)       |         |
| resistant          | 42 (36)        | 21 (34)                  | 21 (38)       |         | 21 (35)                   | 21 (38)       |         | 22 (38)                                               | 20 (35)       |         |
| No chemotherapy    | 4 (4)          | 2 (3)                    | 2 (4)         |         | 2 (3)                     | 2 (2)         |         | 2 (3)                                                 | 2 (4)         |         |
